# Supplementary material
Source: ML conference proceedings conference paper supplement (https://openreview.net/forum?id=IhiU6AJYpDs)
Supplement: supplementary_material [file attachment]

## Supplementary Materials

### A Proof of Theorem 2: Asymptotic Convergence of Robust Q-Learning

In this section we show that the robust Q-learning converges exactly to the optimal robust Q function  $Q^*$ . Recall that the optimal robust Q function  $Q^*$  is the solution to the robust Bellman operator  $\mathbf{T}$ :

$$Q^*(s, a) = c(s, a) + \gamma \sigma_{\mathcal{P}_s^a} \left( \left( \min_{a \in \mathcal{A}} Q^*(s_1, a), \min_{a \in \mathcal{A}} Q^*(s_2, a), \dots, \min_{a \in \mathcal{A}} Q^*(s_{|S|}, a) \right)^\top \right). \quad (14)$$

It can be shown that the estimated update is an unbiased estimation of  $\mathbf{T}$ . More specifically,

$$\begin{aligned} \mathbf{T}Q(s, a) &= c(s, a) + \gamma \sigma_{\mathcal{P}_s^a}(V) \\ &= c(s, a) + \gamma(1 - R)(p_s^a)^\top V + R \max_{s'} V(s') \\ &= c(s, a) + \gamma(1 - R) \sum_{s'} (p_{s, s'}^a) V(s') + R \max_{s'} V(s') \\ &= c(s, a) + \gamma \sum_{s'} p_{s, s'}^a \left( (1 - R)(\mathbb{1}_{s'})^\top V + R \max_q q^\top V \right), \end{aligned} \quad (15)$$

which is the expectation of the estimated update in line 5 of Algorithm 1.

#### A.1 Robust Bellman operator is a contraction

It was shown in [Iyengar, 2005, Roy et al., 2017] that the robust Bellman operator is a contraction. Here, for completeness, we include the proof for our R-contamination uncertainty set. More specifically,

$$\begin{aligned} &|\mathbf{T}Q(s, a) - \mathbf{T}Q'(s, a)| \\ &= |c(s, a) + \gamma \sigma_{\mathcal{P}_s^a}(V) - c(s, a) - \gamma \sigma_{\mathcal{P}_s^a}(V')| \\ &= \gamma |\sigma_{\mathcal{P}_s^a}(V) - \sigma_{\mathcal{P}_s^a}(V')| \\ &= \gamma \left| \max_q \left\{ (1 - R)(p_s^a)^\top V + Rq^\top V \right\} - \max_{q'} \left\{ (1 - R)(p_s^a)^\top V' + Rq'^\top V' \right\} \right| \\ &= \gamma \left| \sum_{s' \in \mathcal{S}} p_{s, s'}^a ((1 - R)V(s') + R \max_{s'} V(s')) - \sum_{s' \in \mathcal{S}} p_{s, s'}^a ((1 - R)V'(s') + R \max_{s'} V'(s')) \right| \\ &= \gamma \left| \sum_{s' \in \mathcal{S}} p_{s, s'}^a (1 - R) (V(s') - V'(s')) + R(\max_{s'} V(s') - \max_{s'} V'(s')) \right| \\ &\leq \gamma \left| \sum_{s' \in \mathcal{S}} p_{s, s'}^a (1 - R) \left( \min_a Q(s', a) - \min_b Q'(s', b) \right) \right| + \gamma R (|\max_{s'} V(s') - \max_{s'} V'(s')|) \\ &\leq \gamma \sum_{s' \in \mathcal{S}} p_{s, s'}^a (1 - R) \left| \left( \min_a Q(s', a) - \min_b Q'(s', b) \right) \right| + \gamma R \max_s |(V(s) - V'(s))| \\ &\stackrel{(a)}{\leq} \gamma \sum_{s' \in \mathcal{S}} p_{s, s'}^a (1 - R) \|Q - Q'\|_\infty + \gamma R \|Q - Q'\|_\infty \\ &\leq \gamma \|Q - Q'\|_\infty, \end{aligned} \quad (16)$$

where (a) can be shown as below. Assume that  $a_1 = \arg \min_a Q(s', a)$  and  $b_1 = \arg \min_a Q'(s', a)$ . Then if  $Q(s', a_1) > Q'(s', b_1)$ , then

$$|Q(s', a_1) - Q'(s', b_1)| = Q(s', a_1) - Q'(s', b_1) \leq Q(s', b_1) - Q'(s', b_1) \leq \|Q - Q'\|_\infty. \quad (17)$$

Similarly, it can also be shown when  $Q(s', a_1) \leq Q'(s', b_1)$ , and hence the inequality (a) holds.

## A.2 Asymptotic Convergence of Robust Q-Learning

With the definition of  $\mathbf{T}$ , the update (5) of robust Q-learning can be re-written as a stochastic approximation:

$$Q_{t+1}(s_t, a_t) = (1 - \alpha_t)Q_t(s_t, a_t) + \alpha_t(\mathbf{T}Q_t(s_t, a_t) + \eta_t(s_t, a_t, s_{t+1})), \quad (18)$$

where the noise term is

$$\eta_t(s_t, a_t, s_{t+1}) = c(s_t, a_t) + \gamma R \max_s V_t(s) + \gamma(1 - R)V_t(s_{t+1}) - \mathbf{T}Q_t(s_t, a_t). \quad (19)$$

From (15), we have that

$$\mathbb{E}[\eta_t(S_t, A_t, S_{t+1}) | S_t = s_t, A_t = a_t] = 0. \quad (20)$$

The variance can be bounded by

$$\mathbb{E}[(\eta_t(S_t, A_t, S_{t+1}))^2] \leq \gamma^2(1 - R)^2(\max_{s,a} Q_t^2(s, a)), \quad (21)$$

where the last inequality is from  $V_t(s_{t+1}) \leq \max_s V_t(s) \leq \max_{s,a} Q_t(s, a)$ . Thus the noise term  $\eta_t$  has zero mean and bounded variance. From [Borkar and Meyn, 2000], we know that the stochastic approximation (18) converges to the fixed point of  $\mathbf{T}$ , i.e.,  $Q^*$ . Hence we showed that robust Q-learning converges to optimal optimal robust Q function  $Q^*$  with probability 1.

## B Finite-Time Analysis of Robust Q-Learning

In this section, we develop the finite-time analysis of the Algorithm 1.

### B.1 Notations

We first introduce some notations. For a vector  $v = (v_1, v_2, \dots, v_n)$ , we denote the entry wise absolute value  $(|v_1|, \dots, |v_n|)$  by  $|v|$ . For a sample  $O_t = (s_t, a_t, s_{t+1})$ , define  $\Lambda_{t+1} \in \mathbb{R}^{|\mathcal{S}||\mathcal{A}| \times |\mathcal{S}||\mathcal{A}|}$  as

$$\Lambda_{t+1}((s, a), (s', a')) = \begin{cases} \alpha, & \text{if } (s, a) = (s', a') = (s_t, a_t), \\ 0, & \text{otherwise.} \end{cases} \quad (22)$$

Also we define the sample transition matrix  $P_{t+1} \in \mathbb{R}^{|\mathcal{S}||\mathcal{A}| \times |\mathcal{S}|}$  as

$$P_{t+1}((s, a), s') = \begin{cases} 1, & \text{if } (s, a, s') = O_t, \\ 0, & \text{otherwise.} \end{cases} \quad (23)$$

We also define the transition kernel matrix  $P \in \mathbb{R}^{|\mathcal{S}||\mathcal{A}| \times |\mathcal{S}|}$  as

$$P((s, a), s') = p_{s,s'}^a. \quad (24)$$

We use  $Q_t \in \mathbb{R}^{|\mathcal{S}||\mathcal{A}|}$  and  $V_t \in \mathbb{R}^{|\mathcal{S}|}$  to denote the vectors of value functions. Denote the cost function  $c \in \mathbb{R}^{|\mathcal{S}||\mathcal{A}|}$  with entry  $c(s, a)$  being the cost received at  $(s, a)$ . Then the update of robust Q-learning (5) can be written in matrix form as

$$Q_t = (I - \Lambda_t)Q_{t-1} + \Lambda_t \left( c + \gamma(1 - R)P_t V_{t-1} + \gamma R \max_{s \in \mathcal{S}} V_{t-1}(s) P_t \mathbf{1} \right), \quad (25)$$

where  $\mathbf{1}$  denotes the vector  $(1, 1, 1, \dots, 1)^\top \in \mathbb{R}^{|\mathcal{S}|}$ . The robust Bellman equation can be written as

$$Q^* = c + \gamma(1 - R)P V^* + \gamma R \max_{s \in \mathcal{S}} V^*(s) P \mathbf{1}. \quad (26)$$

### B.2 Analysis

Define  $\psi_t = Q_t - Q^*$ , then by (25) and (26), we have that

$$\begin{aligned} \psi_t &= Q_t - Q^* \\ &= (I - \Lambda_t)Q_{t-1} + \Lambda_t \left( c + \gamma(1 - R)P_t V_{t-1} + \gamma R \max_{s \in \mathcal{S}} V_{t-1}(s) P_t \mathbf{1} \right) - Q^* \end{aligned}$$

$$\begin{aligned}
&= (I - A_t)(Q_{t-1} - Q^*) + A_t(c + \gamma(1 - R)P_t V_{t-1} + \gamma R \max_{s \in \mathcal{S}} V_{t-1}(s)P_t \mathbf{1} - Q^*) \\
&= (I - A_t)\psi_{t-1} + A_t(\gamma(1 - R)P_t V_{t-1} + \gamma R \max_{s \in \mathcal{S}} V_{t-1}(s)P_t \mathbf{1} - \gamma(1 - R)PV^* \\
&\quad - \gamma R \max_{s \in \mathcal{S}} V^*(s)P \mathbf{1}) \\
&= (I - A_t)\psi_{t-1} + \gamma(1 - R)A_t \underbrace{(P_t V_{t-1} - PV^*)}_{k_1} \\
&\quad + \gamma R A_t \underbrace{(\max_{s \in \mathcal{S}} V_{t-1}(s)P_t \mathbf{1} - \max_{s \in \mathcal{S}} V^*(s)P \mathbf{1})}_{k_2}. \tag{27}
\end{aligned}$$

The term  $k_1$  can be written as

$$P_t V_{t-1} - PV^* = P_t V_{t-1} - P_t V^* + P_t V^* - PV^* = P_t(V_{t-1} - V^*) + (P_t - P)V^*. \tag{28}$$

Similarly, we have that

$$k_2 = \left( \max_{s \in \mathcal{S}} V_{t-1}(s) - \max_{s \in \mathcal{S}} V^*(s) \right) P_t \mathbf{1} + \max_{s \in \mathcal{S}} V^*(s)(P_t - P)\mathbf{1}. \tag{29}$$

Hence (27) can be written as

$$\begin{aligned}
\psi_t &= Q_t - Q^* \\
&= (I - A_t)\psi_{t-1} + \gamma(1 - R)A_t(P_t(V_{t-1} - V^*) + (P_t - P)V^*) \\
&\quad + \gamma R A_t \left( \left( \max_{s \in \mathcal{S}} V_{t-1}(s) - \max_{s \in \mathcal{S}} V^*(s) \right) P_t \mathbf{1} + \max_{s \in \mathcal{S}} V^*(s)(P_t - P)\mathbf{1} \right) \\
&= (I - A_t)\psi_{t-1} + \left( \gamma(1 - R)A_t(P_t - P)V^* + \gamma R A_t(\max_{s \in \mathcal{S}} V^*(s)(P_t - P)\mathbf{1}) \right) \\
&\quad + \left( \gamma(1 - R)A_t(P_t(V_{t-1} - V^*)) + \gamma R A_t \left( \left( \max_{s \in \mathcal{S}} V_{t-1}(s) - \max_{s \in \mathcal{S}} V^*(s) \right) P_t \mathbf{1} \right) \right). \tag{30}
\end{aligned}$$

By applying (30) recursively, we have that

$$\begin{aligned}
\psi_t &= \underbrace{\prod_{j=1}^t (I - A_j)}_{k_{1,t}} \psi_0 \\
&\quad + \underbrace{\gamma(1 - R) \sum_{i=1}^t \prod_{j=i+1}^t (I - A_j) A_i (P_i - P)V^* + \gamma R \sum_{i=1}^t \prod_{j=i+1}^t (I - A_j) A_i \max_{s \in \mathcal{S}} V^*(s)(P_i - P)\mathbf{1}}_{k_{2,t}} \\
&\quad + \underbrace{\gamma(1 - R) \sum_{i=1}^t \prod_{j=i+1}^t (I - A_j) A_i P_i (V_{i-1} - V^*) + \gamma R \sum_{i=1}^t \prod_{j=i+1}^t (I - A_j) A_i (\max_{s \in \mathcal{S}} V_{i-1}(s) - \max_{s \in \mathcal{S}} V^*(s))P_i \mathbf{1}}_{k_{3,t}}. \tag{31}
\end{aligned}$$

We then bound terms  $k_{i,t}$  separately.

**Lemma 1.** Define  $t_{\text{frame}} = \frac{443t_{\text{mix}}}{\mu_{\text{min}}} \log \frac{4|\mathcal{S}||\mathcal{A}|T}{\delta}$ . Then with probability at least  $1 - \delta$ , for any  $(s, a) \in \mathcal{S} \times \mathcal{A}$  and any  $t \geq t_{\text{frame}}$ ,  $k_{1,t}$  can be bounded as

$$|k_{1,t}| \leq (1 - \alpha)^{\frac{t\mu_{\text{min}}}{2}} \|\psi_0\|_{\infty} \mathbf{1}; \tag{32}$$

and for  $t < t_{\text{frame}}$ ,

$$|k_{1,t}| \leq \|\psi_0\|_{\infty} \mathbf{1}. \tag{33}$$

*Proof.* First note that the  $(s, a)$ -entry of  $k_{1,t}$  can be written as

$$k_{1,t}(s, a) = (1 - \alpha)^{K_t(s, a)} \psi_0(s, a), \tag{34}$$

where  $K_t(s, a)$  denotes the times that the sample trajectory visits  $(s, a)$  before the time step  $t$ . We introduce a lemma from [Li et al., 2020] first:

**Lemma 2.** (Lemma 5 [Li et al., 2020]) For a time-homogeneous and uniformly ergodic Markov chain with state space  $\mathcal{X}$  and any  $0 < \delta < 1$ , if  $t \geq \frac{443t_{\text{mix}}}{\mu_{\min}} \log \frac{|\mathcal{X}|}{\delta}$ , then for any  $y \in \mathcal{X}$ ,

$$\mathbb{P}_{X_1=y} \left\{ \exists x \in \mathcal{X} : \sum_{j=1}^t \mathbb{1}_{X_j = x} \leq \frac{t\mu(x)}{2} \right\} \leq \delta, \quad (35)$$

where  $t_{\text{mix}} = \min \{t : \max_{x \in \mathcal{X}} d_{TV}(\mu, P^t(\cdot|x)) \leq \frac{1}{4}\}$ ;  $\mu$  is the stationary distribution of the Markov chain, and  $\mu_{\min} \triangleq \min_{x \in \mathcal{X}} \mu(x)$ .

From this lemma, we know that for any  $(s, a) \in \mathcal{S} \times \mathcal{A}$  and any  $t \geq \frac{443t_{\text{mix}}}{\mu_{\min}} \log \frac{4|\mathcal{S}||\mathcal{A}|T}{\delta}$ , we have that

$$K_t(s, a) \geq \frac{t\mu_{\min}}{2}, \quad (36)$$

with probability at least  $1 - \delta$ .

Thus (34) can be bounded as

$$|k_{1,t}(s, a)| \leq (1 - \alpha)^{\frac{t\mu_{\min}}{2}} |\psi_0(s, a)| \quad (37)$$

with probability at least  $1 - \delta$  for any  $(s, a) \in \mathcal{S} \times \mathcal{A}$  and any  $t \geq \frac{443t_{\text{mix}}}{\mu_{\min}} \log \frac{4|\mathcal{S}||\mathcal{A}|T}{\delta}$ , which shows the claim.

For  $t < t_{\text{frame}}$ , the bound is obvious by noting that  $\|I - \Lambda_j\| \leq 1$ .  $\square$

**Lemma 3.** There exists some constant  $\hat{c}$ , such that for any  $\delta < 1$  and any  $t \leq T$  that satisfies  $0 < \alpha \log \frac{|\mathcal{S}||\mathcal{A}|T}{\delta} < 1$ , with probability at least  $1 - \frac{\delta}{|\mathcal{S}||\mathcal{A}|T}$ ,

$$|k_{2,t}| \leq 5\gamma\hat{c} \sqrt{\alpha \log \frac{T|\mathcal{S}||\mathcal{A}|}{\delta}} \|V^*(s)\|_{\infty} \mathbf{1}, \quad (38)$$

*Proof.* Recall that

$$k_{2,t} = \gamma(1 - R) \sum_{i=1}^t \prod_{j=i+1}^t (I - \Lambda_j) \Lambda_i (P_i - P) V^* + \gamma R \sum_{i=1}^t \prod_{j=i+1}^t (I - \Lambda_j) \Lambda_i (P_i - P) w^*, \quad (39)$$

where  $w^* \triangleq \max_{s \in \mathcal{S}} V^*(s) \mathbf{1}$ . Then the  $(s, a)$ -th entry of  $k_{2,t}$  can be written as

$$\begin{aligned} k_{2,t}(s, a) &= \gamma(1 - R) \sum_{i=1}^{K_t(s,a)} \alpha(1 - \alpha)^{K_t(s,a)-i} (P_{t_{i+1}}(s, a) - P(s, a)) V^* \\ &\quad + \gamma R \sum_{i=1}^{K_t(s,a)} \alpha(1 - \alpha)^{K_t(s,a)-i} (P_{t_{i+1}}(s, a) - P(s, a)) w^*, \end{aligned} \quad (40)$$

where  $t_i(s, a)$  is the time step when the trajectory visits  $(s, a)$  for the  $i$ -th time. We define  $\text{Var}_P(V) \in \mathbb{R}^{|\mathcal{S}||\mathcal{A}|}$  being a vector, where  $\text{Var}_P(V)(s, a) = \sum_{s' \in \mathcal{S}} p_{s,s'}^a (V(s')^2) - (\sum_{s' \in \mathcal{S}} p_{s,s'}^a V(s'))^2 \triangleq \text{Var}_{P_s^a}[V]$  for any  $V \in \mathbb{R}^{|\mathcal{S}|}$ .

From Section E.1 in [Li et al., 2020], we know that

$$\text{Var} \left[ \sum_{i=1}^K \alpha(1 - \alpha)^{K-i} (P_{t_{i+1}}(s, a) - P(s, a)) V^* \right] = \alpha \text{Var}_{P_s^a}[V^*] \triangleq \sigma_K^2 \quad (41)$$

for some constant  $\sigma_K^2$  and any  $K \leq T$ . Moreover, note that

$$\text{Var} \left[ \sum_{i=1}^K \alpha(1 - \alpha)^{K-i} (P_{t_{i+1}}(s, a) - P(s, a)) w^* \right]$$

$$\begin{aligned}
&\stackrel{(a)}{=} \sum_{i=1}^K \alpha^2 (1-\alpha)^{2K-2i} \text{Var}[(P_{t_{i+1}}(s, a) - P(s, a))w^*] \\
&\stackrel{(b)}{=} \sum_{i=1}^K \alpha^2 (1-\alpha)^{2K-2i} \text{Var}[\max_s V^*(s)((P_{t_{i+1}}(s, a) - P(s, a))\mathbf{1})] \\
&= 0,
\end{aligned} \tag{42}$$

where equation (a) is due to the fact that  $\{P_{t_1}(s, a), P_{t_2}(s, a), \dots, P_{t_{i+1}}(s, a)\}_{i \in \mathbb{N}}$  are independent (Equation (101) in [Li et al., 2020]), (b) is from the definition of  $\omega^*$ , and the last equation is because the sum of each entries of  $P_{t_{i+1}}(s, a) - P(s, a)$  is 0.

the last equality is due to the fact that every entries of  $w^*$  are the same and hence  $\text{Var}_{P_s^a}[w^*] = 0$ .

Additionally, we have that

$$\|\alpha(1-\alpha)^{K-i}(P_{t_{i+1}}(s, a) - P(s, a))V^*\|_\infty \leq 2\alpha\|V^*(s)\|_\infty \triangleq D, \tag{43}$$

where we denote the bound by  $D$ . Also,

$$\|\alpha(1-\alpha)^{K-i}(P_{t_{i+1}}(s, a) - P(s, a))w^*\|_\infty \leq D. \tag{44}$$

Hence from the Bernstein inequality ([Li et al., 2020]), we have that

$$\begin{aligned}
&|k_{2,t}(s, a)| \\
&\leq \gamma(1-R)\hat{c} \left( \sqrt{\sigma_K^2 \log\left(\frac{T|\mathcal{S}||\mathcal{A}|}{\delta}\right)} + D \log\frac{T|\mathcal{S}||\mathcal{A}|}{\delta} \right) + \gamma R \hat{c} \left( D \log\frac{T|\mathcal{S}||\mathcal{A}|}{\delta} \right) \\
&\leq 5\gamma\hat{c} \sqrt{\alpha \log\frac{T|\mathcal{S}||\mathcal{A}|}{\delta}} \|V^*(s)\|_\infty,
\end{aligned} \tag{45}$$

for some constant  $\hat{c}$  with probability at least  $1 - \frac{\delta}{|\mathcal{S}||\mathcal{A}|T}$ , and the last step is due to the fact that  $\text{Var}_{P_s^a}[V^*] \leq \|V^*\|_\infty^2$  and  $\alpha \log\frac{|\mathcal{S}||\mathcal{A}|T}{\delta} < 1$ . This hence completes the proof.  $\square$

**Lemma 4.** For any  $t \geq T$ ,

$$|k_{3,t}| \leq \gamma \sum_{i=1}^t \|\psi_{i-1}\|_\infty \prod_{j=i+1}^t (I - \Lambda_j)(\Lambda_i)\mathbf{1}. \tag{46}$$

*Proof.* First note that for any  $i$ ,

$$\|P_i(V_{i-1} - V^*)\|_\infty \leq \|P_i\|_1 \|V_{i-1} - V^*\|_\infty = \|V_{i-1} - V^*\|_\infty \leq \|\psi_{i-1}\|_\infty, \tag{47}$$

where the last inequality is from

$$\begin{aligned}
\|V_{i-1} - V^*\|_\infty &= \max_s |V_{i-1}(s) - V^*(s)| = |V_{i-1}(s^*) - V^*(s^*)| \\
&= |\min_a Q_{i-1}(s^*, a) - \min_b Q^*(s^*, b)| \leq \|Q_{i-1} - Q^*\|_\infty,
\end{aligned} \tag{48}$$

where  $s^* = \arg \max |V_{i-1}(s) - V^*(s)|$ . Similarly,

$$\left\| \left( \max_{s \in \mathcal{S}} V_{i-1}(s) - \max_{s \in \mathcal{S}} V^*(s) \right) P_i \mathbf{1} \right\|_\infty \leq \left| \max_{s \in \mathcal{S}} V_{i-1}(s) - \max_{s \in \mathcal{S}} V^*(s) \right| \leq \|\psi_{i-1}\|_\infty, \tag{49}$$

where the last inequality is from  $|\max_{s \in \mathcal{S}} V_{i-1}(s) - \max_{s \in \mathcal{S}} V^*(s)| \leq \|V_{i-1} - V^*\|_\infty \leq \|Q_{i-1} - Q^*\|_\infty$ . Hence  $K_{3,t}$  can be bounded as

$$|k_{3,t}| \leq \gamma \sum_{i=1}^t \|\psi_{i-1}\|_\infty \prod_{j=i+1}^t (I - \Lambda_j)(\Lambda_i)\mathbf{1}. \tag{50}$$

$\square$

Now combine the bounds for terms  $k_{1,t}$ ,  $k_{2,t}$  and  $k_{3,t}$ , we have the bound on  $\psi_t$  as follows.

For  $t < t_{\text{frame}}$ , we have that

$$\begin{aligned} \|\psi_t\|_\infty &\leq \|\psi_0\|_\infty \mathbf{1} + 5\gamma\hat{c}\sqrt{\alpha \log \frac{T|\mathcal{S}||\mathcal{A}|}{\delta}} \|V^*(s)\|_\infty \mathbf{1} \\ &\quad + \gamma \sum_{i=1}^t \|\psi_{i-1}\|_\infty \prod_{j=i+1}^t (I - A_j)(A_i) \mathbf{1}; \end{aligned} \quad (51)$$

and for  $t \geq t_{\text{frame}}$ , we have that

$$\begin{aligned} \|\psi_t\|_\infty &\leq (1 - \alpha)^{\frac{t - \mu_{\min}}{2}} \|\psi_0\|_\infty \mathbf{1} + 5\gamma\hat{c}\sqrt{\alpha \log \frac{T|\mathcal{S}||\mathcal{A}|}{\delta}} \|V^*(s)\|_\infty \mathbf{1} \\ &\quad + \gamma \sum_{i=1}^t \|\psi_{i-1}\|_\infty \prod_{j=i+1}^t (I - A_j)(A_i) \mathbf{1}. \end{aligned} \quad (52)$$

This bound exactly matches the bound in Equation (42) in [Li et al., 2020] and hence the remaining proof for Theorem 3 can be obtained by following the proof in [Li et al., 2020]. We omit the remaining proof and only state the result.

**Theorem 6.** *Define*

$$t_{\text{th}} = \max \left\{ \frac{2 \log \frac{1}{(1-\gamma)^2 \epsilon}}{\alpha \mu_{\min}}, t_{\text{frame}} \right\}; \quad (53)$$

$$\mu_{\text{frame}} = \frac{1}{2} \mu_{\min} t_{\text{frame}}; \quad (54)$$

$$\rho = (1 - \gamma)(1 - (1 - \alpha)^{\mu_{\text{frame}}}), \quad (55)$$

then for any  $\delta < 1$  and any  $\epsilon < \frac{1}{1-\gamma}$ , there exists a universal constant  $\hat{c}$  and  $c_0$  (determined by  $\hat{c}$ ), such that with probability at least  $1 - 6\delta$ , the following bound holds for any  $t < T$ :

$$\|Q_t - Q^*\|_\infty \leq \frac{(1 - \rho)^k \|Q_0 - Q^*\|_\infty}{1 - \rho} + \frac{5\hat{c}\gamma}{1 - \gamma} \sqrt{\alpha \log \frac{|\mathcal{S}||\mathcal{A}|T}{\delta}} + \epsilon, \quad (56)$$

where  $k = \max \left\{ 0, \lfloor \frac{t - t_{\text{th}}}{t_{\text{frame}}} \rfloor \right\}$ , as long as

$$T \geq c_0 \left( \frac{1}{\mu_{\min}(1 - \gamma)^5 \epsilon^2} + \frac{t_{\text{mix}}}{\mu_{\min}(1 - \gamma)} \right) \log \left( \frac{T|\mathcal{S}||\mathcal{A}|}{\delta} \right) \log \left( \frac{1}{\epsilon(1 - \gamma)^2} \right),$$

and step size  $0 < \alpha \log \left( \frac{|\mathcal{S}||\mathcal{A}|T}{\delta} \right) < 1$ .

This theorem implies that the convergence rate of our robust Q-learning is as fast as the one of the vanilla Q-learning algorithm in [Li et al., 2020](except the constant  $\hat{c}$ ).

Finally, to show Theorem 3, we only need to show each term in (56) is smaller than  $\epsilon$ . It can be verified that there exists constants  $c_1$ , such that if we choose the step size  $\alpha = \frac{c_1}{\log \left( \frac{T|\mathcal{S}||\mathcal{A}|}{\delta} \right)} \min \left( \frac{1}{t_{\text{mix}}}, \frac{\epsilon^2(1-\gamma)^4}{\gamma^2} \right)$ , then  $\frac{(1-\rho)^k \|Q_0 - Q^*\|_\infty}{1-\rho} \leq \epsilon$  (inequality (51) in [Li et al., 2020]) and  $\frac{5\hat{c}\gamma}{1-\gamma} \sqrt{\alpha \log \frac{|\mathcal{S}||\mathcal{A}|T}{\delta}} \leq \epsilon$  (by choosing suitable constant  $c_1$ ). Then we have that  $\|Q_t - Q^*\|_\infty \leq 3\epsilon$ . This completes the proof.

## C Proof of Theorem 4: Approximation of Smoothing Robust Bellman Operator

In this section we prove Theorem 4. First note that for any  $x, y \in \mathbb{R}^{|\mathcal{S}|}$ ,

$$|\text{LSE}(x) - \text{LSE}(y)| \leq \sup_{t \in [0,1]} \|\nabla \text{LSE}(tx + (1-t)y)\|_1 \|x - y\|_\infty. \quad (57)$$

It can be shown that the gradient of LSE is softmax, i.e.,

$$\frac{\partial \text{LSE}(x)}{\partial x_i} = \frac{e^{\varrho x_i}}{\sum_j e^{\varrho x_j}}. \quad (58)$$

Hence

$$\|\nabla \text{LSE}(z)\|_1 = 1, \forall z \in \mathbb{R}^{|\mathcal{S}|}, \quad (59)$$

which implies that  $|\text{LSE}(x) - \text{LSE}(y)| \leq \|x - y\|_\infty$ . Hence for any  $x, y \in \mathbb{R}^{|\mathcal{S}|}$ , we have that

$$\begin{aligned} |\hat{\mathbf{T}}_\pi x(s) - \hat{\mathbf{T}}_\pi y(s)| &= \left| \mathbb{E}_A \left[ \gamma(1-R) \sum_{s' \in \mathcal{S}} p_{s,s'}^A (x(s') - y(s')) + \gamma R (\text{LSE}(x) - \text{LSE}(y)) \right] \right| \\ &\leq \gamma(1-R) \|x - y\|_\infty + \gamma R \|x - y\|_\infty \\ &\leq \gamma \|x - y\|_\infty. \end{aligned} \quad (60)$$

This means that  $\hat{\mathbf{T}}_\pi$  is a contraction, which implies that it has a fixed point.

We then show the limit of the fixed points of  $\hat{\mathbf{T}}_\pi$  is the fixed point of  $\mathbf{T}_\pi$ . Note that  $\mathbf{T}_\pi V_1 = V_1$  and  $\hat{\mathbf{T}}_\pi V_2 = V_2$ , hence

$$\begin{aligned} &\|V_1 - V_2\|_\infty \\ &= \|\mathbf{T}_\pi V_1 - \hat{\mathbf{T}}_\pi V_2\|_\infty \\ &\leq \|\mathbf{T}_\pi V_1 - \mathbf{T}_\pi V_2\|_\infty + \|\mathbf{T}_\pi V_2 - \hat{\mathbf{T}}_\pi V_2\|_\infty \\ &= \max_s \left| \mathbb{E}_\pi \left[ \gamma(1-R) \sum_{s'} p_{s,s'}^A V_1(s') + \gamma R \max_{s'} V_1(s') \right. \right. \\ &\quad \left. \left. - \gamma(1-R) \sum_{s'} p_{s,s'}^A V_2(s') - \gamma R \max_{s'} V_2(s') \right] \right| \\ &\quad + \max_s \left| \mathbb{E}_\pi \left[ \gamma R \left( \max_{s'} V_2(s') - \text{LSE}(V_2) \right) \right] \right| \\ &\leq \max_s \mathbb{E}_\pi \left[ \left| \gamma(1-R) \sum_{s'} p_{s,s'}^A (V_1(s') - V_2(s')) \right| + \left| \gamma R \left( \max_{s'} V_1(s') - \max_{s'} V_2(s') \right) \right| \right] \\ &\quad + \max_s \left| \mathbb{E}_\pi \left[ \gamma R \left( \max_{s'} V_2(s') - \text{LSE}(V_2) \right) \right] \right| \\ &\stackrel{(a)}{\leq} \max_s \gamma |V_1(s) - V_2(s)| + \left| \mathbb{E}_\pi \left[ \gamma R \left( \max_{s'} V_2(s') - \text{LSE}(V_2) \right) \right] \right| \\ &\leq \gamma \|V_1 - V_2\|_\infty + \gamma R \frac{\log |\mathcal{S}|}{\varrho}, \end{aligned} \quad (61)$$

where (a) is from  $|V_1(s') - V_2(s')| \leq \max_s |V_1(s) - V_2(s)| = \|V_1 - V_2\|_\infty$  and  $|\max_{s'} V_1(s') - \max_{s'} V_2(s')| \leq \|V_1 - V_2\|_\infty$ , and the last inequality is from  $\text{LSE}(V) - \max V = \frac{\log(\sum_s e^{\varrho V(s)}) - \log e^{\varrho \max V}}{\varrho} = \frac{1}{\varrho} \log \frac{\sum_s e^{\varrho V(s)}}{e^{\varrho \max V}} = \frac{1}{\varrho} \log \sum_s e^{\varrho V(s) - \varrho \max V} \leq \frac{\log |\mathcal{S}|}{\varrho}$ . Hence this completes the proof.

## D Proof of Theorem 5: Finite-Time Analysis of Robust TDC with Linear Function Approximation

In this section we develop the finite-time analysis of the robust TDC algorithm. In the following proofs,  $\|v\|$  denotes the  $l_2$  norm if  $v$  is a vector; and  $\|A\|$  denotes the operator norm if  $A$  is a matrix.

For the convenience of proof, we add a projection step to the algorithm, i.e., we let

$$\theta_{t+1} \leftarrow \Pi_K \left( \theta_t + \alpha \left( \delta_t(\theta_t) \phi_t - \gamma \left( (1-R) \phi_{t+1} + R \sum_{s \in \mathcal{S}} \left( \frac{e^{\varrho V_\theta(s)} \phi_s}{\sum_{j \in \mathcal{S}} e^{\varrho V_\theta(j)}} \right) \phi_t^\top \omega_t \right) \right) \right),$$

$$\omega_{t+1} \leftarrow \Pi_K (\omega_t + \beta(\delta_t(\theta_t) - \phi_t^\top \omega_t) \phi_t), \quad (62)$$

for some constant  $K$ . We note that recently there are several works [Srikant and Ying, 2019, Xu and Liang, 2021, Kaledin et al., 2020] on finite-time analysis of RL algorithms that do not need the projection. However, a direct generalization of their approach does not necessarily work in our case. Specifically, the problem in [Srikant and Ying, 2019] is for one time scale *linear* stochastic approximation, and doesn't need to consider the effect of the  $\omega_t$  introduced, also their work highly depends on the bound of the update functions of  $\theta_t$  (see inequality (18) in [Srikant and Ying, 2019]). The parameter  $\theta_t$  in [Srikant and Ying, 2019] is bounded using itself at a previous timestep by taking advantage of the fact that the update of  $\theta$  is linear. However, in our problem, the update is not linear in  $\theta$ , and our update rule is two time-scale. The approach in [Kaledin et al., 2020] transforms the original two time-scale updates into two asymptotically independent updates via a linear mapping, which is however challenging for our non-linear updates. Some other work, e.g., [Xu and Liang, 2021], gets around this issue by imposing additional assumptions on the function class. Specifically, it is assumed that  $V_\theta$  (non-linear function approximation) is bounded for all  $\theta$ . For the linear function approximation setting considered in this paper, this assumption is equivalent to the assumption of a finite  $\theta$ , which is guaranteed by the projection step in this paper.

### D.1 Lipschitz Smoothness

In this section, we first show that  $\nabla J(\theta)$  is Lipschitz. We begin with an important lemma.

**Lemma 5.** *For any  $(s, a, s') \in \mathcal{S} \times \mathcal{A} \times \mathcal{S}$ , both  $\delta_{s,a,s'}(\theta)$  and  $\nabla \delta_{s,a,s'}(\theta)$  are bounded and Lipschitz, i.e., for any  $\theta$  and  $\theta'$ ,*

$$|\delta_{s,a,s'}(\theta)| \leq c_{\max} + \gamma R \left( K + \frac{\log |\mathcal{S}|}{\varrho} \right) + (1 + \gamma)K \triangleq C_\delta, \quad (63)$$

$$\|\delta_{s,a,s'}(\theta) - \delta_{s,a,s'}(\theta')\| \leq (1 + \gamma)\|\theta - \theta'\| \triangleq L_\delta \|\theta - \theta'\|, \quad (64)$$

$$\|\nabla \delta_{s,a,s'}(\theta) - \nabla \delta_{s,a,s'}(\theta')\| \leq 2\gamma R \varrho \|\theta - \theta'\| \triangleq L'_\delta \|\theta - \theta'\|. \quad (65)$$

*Proof. 1.  $\delta$  is bounded:*

Recall that

$$\delta_{s,a,s'}(\theta) = c(s, a) + \gamma(1 - R)V_\theta(s') + \gamma R \frac{\log(\sum_{j \in \mathcal{S}} e^{\theta^\top \phi_j})}{\varrho} - V_\theta(s). \quad (66)$$

First we have that

$$\begin{aligned} |\delta_{s,a,s'}(\theta)| &\leq c_{\max} + \gamma(1 - R)K + \gamma R \frac{\log |\mathcal{S}| e^{K\varrho}}{\varrho} + \gamma R K + K \\ &= c_{\max} + \gamma R \left( K + \frac{\log |\mathcal{S}|}{\varrho} \right) + (1 + \gamma)K. \end{aligned} \quad (67)$$

**2.  $\delta$  is Lipschitz:**

The Lipschitz smoothness of  $\delta_{s,a,s'}$  can be showed by finding the bound of  $\nabla \delta_{s,a,s'}$ . We first recall that

$$\nabla \delta_{s,a,s'}(\theta) = \gamma(1 - R)\phi_{s'} + \gamma R \frac{\sum_i e^{\theta^\top \phi_i} \phi_i}{\sum_j e^{\theta^\top \phi_j}} - \phi_s. \quad (68)$$

Hence

$$\|\nabla \delta_{s,a,s'}(\theta)\| \leq \gamma(1 - R) + 1 + \gamma R = 1 + \gamma. \quad (69)$$

**3.  $\nabla \delta$  is Lipschitz:**

Finally we need to verify the Lipschitz smoothness of  $\nabla \delta_{s,a,s'}(\theta)$ , which can be implied from the bound of  $\nabla^2 \delta_{s,a,s'}(\theta)$ . First we have that

$$\nabla^2 \delta_{s,a,s'}(\theta) = \gamma R \varrho \frac{\sum_{i,j} e^{\theta^\top (\phi_i + \phi_j)} \phi_i^\top \phi_i - \sum_{i,j} e^{\theta^\top (\phi_i + \phi_j)} \phi_i^\top \phi_j}{(\sum_j e^{\theta^\top \phi_j})^2} \leq 2\gamma R \varrho. \quad (70)$$

□



With this lemma, we then show that  $\nabla J(\theta)$  is Lipschitz as follows.

**Lemma 6.** For any  $\theta$  and  $\theta'$ , we have that

$$\|\nabla J(\theta) - \nabla J(\theta')\| \leq 2 \left( \frac{L_\delta^2}{\lambda} + \frac{C_\delta L'_\delta}{\lambda} \right) \|\theta - \theta'\| \triangleq L_J \|\theta - \theta'\|. \quad (71)$$

*Proof.* From Lemma 5, we have that

$$\|\mathbb{E}_{\mu_\pi}[(\nabla \delta_{S,A,S'}(\theta))\phi_S]\| \leq L_\delta \quad (72)$$

and

$$\|\mathbb{E}_{\mu_\pi}[(\nabla \delta_{S,A,S'}(\theta))\phi_S] - \mathbb{E}_{\mu_\pi}[(\nabla \delta_{S,A,S'}(\theta'))\phi_S]\| \leq L'_\delta \|\theta - \theta'\|. \quad (73)$$

Also it is easy to see that

$$\|C^{-1}\mathbb{E}_{\mu_\pi}[\delta_{S,A,S'}(\theta)\phi_S]\| \leq \frac{1}{\lambda}C_\delta, \quad (74)$$

and

$$\|C^{-1}\mathbb{E}_{\mu_\pi}[\delta_{S,A,S'}(\theta)\phi_S] - C^{-1}\mathbb{E}_{\mu_\pi}[\delta_{S,A,S'}(\theta')\phi_S]\| \leq \frac{1}{\lambda}L_\delta \|\theta - \theta'\|. \quad (75)$$

Thus this implies that

$$\|\nabla J(\theta) - \nabla J(\theta')\| \leq 2 \left( \frac{L_\delta^2}{\lambda} + \frac{C_\delta L'_\delta}{\lambda} \right) \|\theta - \theta'\|, \quad (76)$$

and hence completes the proof.  $\square$

## D.2 Tracking Error

In this section, we study the bound of the tracking error, which is defined as  $z_t = \omega_t - \omega(\theta_t)$ . First we can rewrite the fast time-scale update in Algorithm 1 as follows:

$$\begin{aligned} z_{t+1} &= \omega_{t+1} - \omega(\theta_{t+1}) \\ &= \omega_t + \beta(\delta_t(\theta_t) - \phi_t^\top \omega_t)\phi_t - \omega(\theta_{t+1}) \\ &= z_t + \omega(\theta_t) + \beta(\delta_t(\theta_t) - \phi_t^\top \omega_t)\phi_t - \omega(\theta_{t+1}) \\ &= z_t + \omega(\theta_t) + \beta(\delta_t(\theta_t) - \phi_t^\top (z_t + \omega(\theta_t)))\phi_t - \omega(\theta_{t+1}) \\ &= z_t + \omega(\theta_t) + \beta\delta_t(\theta_t)\phi_t - \beta\phi_t^\top z_t\phi_t - \beta\phi_t^\top \omega(\theta_t)\phi_t - \omega(\theta_{t+1}) \\ &= z_t - \beta\phi_t\phi_t^\top z_t + \beta(\delta_t(\theta_t)\phi_t - \phi_t\phi_t^\top \omega(\theta_t)) + \omega(\theta_t) - \omega(\theta_{t+1}). \end{aligned} \quad (77)$$

Thus taking the norm of both sides implies that

$$\begin{aligned} \|z_{t+1}\|^2 &\stackrel{(a)}{\leq} \|z_t\|^2 + 3\beta^2\|z_t\|^2 + 3\beta^2\|\delta_t(\theta_t)\phi_t - \phi_t\phi_t^\top \omega(\theta_t)\|^2 + 3\|\omega(\theta_t) - \omega(\theta_{t+1})\|^2 \\ &\quad + 2\langle z_t, -\beta\phi_t\phi_t^\top z_t \rangle + 2\langle z_t, \beta(\delta_t(\theta_t)\phi_t - \phi_t\phi_t^\top \omega(\theta_t)) \rangle + 2\langle z_t, \omega(\theta_t) - \omega(\theta_{t+1}) \rangle \\ &= \|z_t\|^2 - 2\beta z_t^\top C z_t + 3\beta^2\|z_t\|^2 + 3\beta^2\|\delta_t(\theta_t)\phi_t - \phi_t\phi_t^\top \omega(\theta_t)\|^2 + 3\|\omega(\theta_t) - \omega(\theta_{t+1})\|^2 \\ &\quad + 2\beta\langle z_t, (C - \phi_t\phi_t^\top)z_t \rangle + 2\langle z_t, \beta(\delta_t(\theta_t)\phi_t - \phi_t\phi_t^\top \omega(\theta_t)) \rangle + 2\langle z_t, \omega(\theta_t) - \omega(\theta_{t+1}) \rangle \\ &\stackrel{(b)}{\leq} (1 + 3\beta^2 - 2\beta\lambda)\|z_t\|^2 + \beta^2 C_1 + 2\beta\langle z_t, (C - \phi_t\phi_t^\top)z_t \rangle + 2\langle z_t, \omega(\theta_t) - \omega(\theta_{t+1}) \rangle \\ &\quad + 2\langle z_t, \beta(\delta_t(\theta_t)\phi_t - \phi_t\phi_t^\top \omega(\theta_t)) \rangle, \end{aligned} \quad (78)$$

where (a) is from  $\|x + y + z\|^2 \leq 3\|x\|^2 + 3\|y\|^2 + 3\|z\|^2$  for any  $x, y, z \in \mathbb{R}^N$ , (b) is from  $z_t^\top C z_t \geq \lambda\|z_t\|^2$ , and  $C_1 = 3(C_\delta + \frac{C_\delta}{\lambda})^2 + 3(C_\delta + (1 + 2R\rho K)\frac{C_\delta}{\lambda})^2$  is the upper bound of  $3\|\delta_t(\theta_t)\phi_t - \phi_t\phi_t^\top \omega(\theta_t)\|^2 + \frac{3}{\beta^2}\|\omega(\theta_t) - \omega(\theta_{t+1})\|^2$ .

Taking expectation on both sides and applying recursively (78), we obtain that

$$\mathbb{E}[\|z_{t+1}\|^2] \leq q^{t+1}\|z_0\|^2 + 2\sum_{j=0}^t q^{t-j}\beta\mathbb{E}[f(z_j, O_j)] + 2\sum_{j=0}^t q^{t-j}\beta\mathbb{E}[g(z_j, \theta_j, O_j)]$$

$$+ 2 \sum_{j=0}^t q^{t-j} \langle z_j, \omega(\theta_j) - \omega(\theta_{j+1}) \rangle + \beta^2 C_1 \sum_{j=0}^t q^{t-j}, \quad (79)$$

where

$$\begin{aligned} q &\triangleq 1 + 3\beta^2 - 2\beta\lambda, \\ f(z_j, O_j) &\triangleq \langle z_j, (C - \phi_j \phi_j^\top) z_j \rangle, \\ g(z_j, \theta_j, O_j) &\triangleq \langle z_j, \delta_j(\theta_j) \phi_j - \phi_j \phi_j^\top \omega(\theta_j) \rangle. \end{aligned} \quad (80)$$

To simplify notations, let

$$\theta_{t+1} \leftarrow \theta_t + \alpha G_t(\theta_t, \omega_t), \quad (81)$$

$$\omega_{t+1} \leftarrow \omega_t + \beta H_t(\theta_t, \omega_t), \quad (82)$$

where  $G_t(\theta, \omega) = \delta_t(\theta) \phi_t - \gamma \left( (1-R) \phi_{t+1} + R \frac{\sum_i e^{e\theta^\top \phi_i} \phi_i}{\sum_j e^{e\theta^\top \phi_j}} \right) \phi_t^\top \omega$ , and  $H_t(\theta, \omega) = (\delta_t(\theta_t) - \phi_t^\top \omega_t) \phi_t$ .

We have

$$\|G_t(\theta, \omega)\| \leq C_\delta + K\gamma \triangleq C_G. \quad (83)$$

The upper bound of  $H_t(\theta, \omega)$  is straightforward:

$$\|H_t(\theta, \omega)\| \leq C_\delta + K \triangleq C_H. \quad (84)$$

With these two bounds we can then find the upper bound of the update of tracking error:

$$\begin{aligned} \|z_{t+1} - z_t\| &\leq \|H_t(\theta_t, \omega_t)\| + \|\omega(\theta_{t+1}) - \omega(\theta_t)\| \\ &\stackrel{(a)}{\leq} \beta C_H + \alpha \frac{C_\delta}{\lambda} \|G_t(\theta_t, \omega_t)\| \\ &\leq \beta C_H + \alpha \frac{C_\delta C_G}{\lambda}, \end{aligned} \quad (85)$$

where (a) is from the Lipschitz of  $\omega(\theta)$ :  $\|\omega(\theta_{t+1}) - \omega(\theta_t)\| \leq \frac{L_\delta}{\lambda} \|\theta_{t+1} - \theta_t\| \leq \frac{\alpha L_\delta}{\lambda} \|G_t(\theta_t, \omega_t)\|$ . Then for the Lipschitz smoothness of function  $g$  in (80), it is straightforward to see that

$$\begin{aligned} &|g(\theta, z, O_t) - g(\theta', z', O_t)| \\ &= \langle z, \delta_j(\theta) \phi_j - \phi_j \phi_j^\top \omega(\theta) \rangle - \langle z', \delta_j(\theta') \phi_j - \phi_j \phi_j^\top \omega(\theta') \rangle \\ &= \langle z, \delta_j(\theta) \phi_j - \phi_j \phi_j^\top \omega(\theta) \rangle - \langle z, \delta_j(\theta') \phi_j - \phi_j \phi_j^\top \omega(\theta') \rangle \\ &\quad + \langle z, \delta_j(\theta') \phi_j - \phi_j \phi_j^\top \omega(\theta') \rangle - \langle z', \delta_j(\theta') \phi_j - \phi_j \phi_j^\top \omega(\theta') \rangle \\ &\leq K_z L_\delta \left(1 + \frac{1}{\lambda}\right) \|\theta - \theta'\| + C_\delta \left(1 + \frac{1}{\lambda}\right) \|z - z'\|, \end{aligned} \quad (86)$$

where  $K_z \triangleq K + \frac{C_\delta}{\lambda}$  being a rough bound on the track error. Also it can be shown that

$$\begin{aligned} |f(z, O_t) - f(z', O_t)| &= \langle z, (C - \phi_t \phi_t^\top) z \rangle - \langle z', (C - \phi_t \phi_t^\top) z' \rangle \\ &= \langle z, (C - \phi_t \phi_t^\top) z \rangle - \langle z, (C - \phi_t \phi_t^\top) z' \rangle \\ &\quad + \langle z, (C - \phi_t \phi_t^\top) z' \rangle - \langle z', (C - \phi_t \phi_t^\top) z' \rangle \\ &\leq 4K_z \|z - z'\|. \end{aligned} \quad (87)$$

It is easy to see that

$$\|G_i(\theta, \omega_1) - G_i(\theta, \omega_2)\| \leq (\gamma + 2\gamma R_\rho K) \|\omega_1 - \omega_2\|. \quad (88)$$

With these bounds and Lipschitz constants, the following two lemmas can be proved using the similar method of decoupling the Markovian noise in [Wang and Zou, 2020, Bhandari et al., 2018, Zou et al., 2019].

**Lemma 7.** Define  $\tau_\beta = \min \{k : m\rho^k \leq \beta\}$ . If  $t < \tau_\beta$ , then

$$\mathbb{E}[f(z_t, O_t)] \leq 4K_z^2; \quad (89)$$

and if  $t \geq \tau_\beta$ , then

$$\mathbb{E}[f(z_t, O_t)] \leq m_f \beta + m'_f \tau_\beta \beta, \quad (90)$$

where  $m_f = 8K_z^2$  and  $m'_f = 8K_z (C_H + \frac{C_G C_\delta}{\lambda})$ .

A similar result on  $\mathbb{E}[g(\theta_t, z_t, O_t)]$  can also be implied:

**Lemma 8.** If  $t < \tau_\beta$ , then

$$\mathbb{E}[g(\theta_t, z_t, O_t)] \leq 2K_z \left(1 + \frac{1}{\lambda}\right) C_\delta; \quad (91)$$

and if  $t \geq \tau_\beta$ , then

$$\mathbb{E}[g(\theta_t, z_t, O_t)] \leq m_g \beta + m'_g \tau_\beta \beta, \quad (92)$$

where  $m_g = 4K_z (1 + \frac{1}{\lambda}) C_\delta$  and  $m'_g = 4K_z L_\delta C_G (1 + \frac{1}{\lambda}) + C_\delta (1 + \frac{1}{\lambda}) (C_H + \frac{C_G C_\delta}{\lambda})$ .

One more lemma is needed to bound the tracking error.

**Lemma 9.** Define  $h(\theta, z, O_t) = \left\langle z, -\nabla\omega(\theta) \left(G_t(\theta, \omega(\theta)) + \frac{\nabla J(\theta)}{2}\right) \right\rangle$ , then if  $t < \tau_\beta$ ,

$$\mathbb{E}[h(\theta_t, z_t, O_t)] \leq K_z C_h; \quad (93)$$

and if  $t \geq \tau_\beta$ ,

$$\mathbb{E}[h(\theta_t, z_t, O_t)] \leq m_h \beta + m'_h \tau_\beta \beta, \quad (94)$$

where  $m_h = 2K_z C_h$  and  $m'_h = C_h (C_H + \frac{C_\delta C_G}{\lambda}) + K_z L_h C_G$ .

*Proof.* First we show the Lipschitz smoothness of  $h$  as follows. For any  $\theta, \theta', z$  and  $z'$ , we have that

$$\begin{aligned} & h(\theta, z, O_t) - h(\theta', z', O_t) \\ &= \left\langle z, -\nabla\omega(\theta) \left(G_t(\theta, \omega(\theta)) + \frac{\nabla J(\theta)}{2}\right) \right\rangle - \left\langle z', -\nabla\omega(\theta') \left(G_t(\theta', \omega(\theta')) + \frac{\nabla J(\theta')}{2}\right) \right\rangle \\ &= \left\langle z, -\nabla\omega(\theta) \left(G_t(\theta, \omega(\theta)) + \frac{\nabla J(\theta)}{2}\right) \right\rangle - \left\langle z', -\nabla\omega(\theta) \left(G_t(\theta, \omega(\theta)) + \frac{\nabla J(\theta)}{2}\right) \right\rangle \\ &\quad + \left\langle z', -\nabla\omega(\theta) \left(G_t(\theta, \omega(\theta)) + \frac{\nabla J(\theta)}{2}\right) \right\rangle - \left\langle z', -\nabla\omega(\theta') \left(G_t(\theta', \omega(\theta')) + \frac{\nabla J(\theta')}{2}\right) \right\rangle. \end{aligned} \quad (95)$$

We note that

$$\begin{aligned} & \left\| -\nabla\omega(\theta) \left(G_t(\theta, \omega(\theta)) + \frac{\nabla J(\theta)}{2}\right) \right\| \\ & \leq \frac{L_\delta}{\lambda} \left( C_\delta + \gamma(1-R) + 2\varrho K \gamma R \frac{C_\delta}{\lambda} + \frac{2L_\delta C_\delta}{\lambda} \right) \triangleq C_h, \end{aligned} \quad (96)$$

and

$$\begin{aligned} & \left\| -\nabla\omega(\theta) \left(G_t(\theta, \omega(\theta)) + \frac{\nabla J(\theta)}{2}\right) + \nabla\omega(\theta') \left(G_t(\theta', \omega(\theta')) + \frac{\nabla J(\theta')}{2}\right) \right\| \\ & \leq \left( \frac{L'_\delta}{L_\delta} C_h + \frac{L_\delta L_{G^*}}{\lambda} + \frac{L_\delta L_J}{2\lambda} \right) \|\theta - \theta'\| \triangleq L_h \|\theta - \theta'\|. \end{aligned} \quad (97)$$

Hence we have that

$$h(\theta, z, O_t) - h(\theta', z', O_t) \leq C_h \|z - z'\| + K_z L_h \|\theta - \theta'\|. \quad (98)$$

We have shown before in (85) that

$$\|z_{t+1} - z_t\| \leq \beta C_H + \alpha \frac{C_\delta C_G}{\lambda}. \quad (99)$$

Hence, we have that

$$|h(\theta_t, z_t, O_t) - h(\theta_{t-\tau}, z_{t-\tau}, O_t)| \leq C_h \left( \beta C_H + \alpha \frac{C_\delta C_G}{\lambda} \right) \tau + K_z L_h C_G \tau \alpha. \quad (100)$$

Define an independent random variable  $\hat{O} = (\hat{S}, \hat{A}, \hat{S}') \sim \mu_\pi \times \mathbb{P}(\cdot | \hat{S}, \hat{A})$ , then we have

$$\mathbb{E}_{\hat{O}}[h(\theta, z, \hat{O})] = 0 \quad (101)$$

for any  $\theta$  and  $z$ . Thus by uniform ergodicity, we have that

$$\mathbb{E}[h(\theta_{t-\tau}, z_{t-\tau}, O_t)] \leq \mathbb{E}[h(\theta_{t-\tau}, z_{t-\tau}, O_t)] - \mathbb{E}_{\hat{O}}[h(\theta_t, z_t, \hat{O})] \leq 2K_z C_h m \rho^\tau. \quad (102)$$

Then if  $t \leq \tau_\beta$ , we have the straightforward bound

$$\mathbb{E}[h(\theta_t, z_t, O_t)] \leq K_z C_h; \quad (103)$$

and if  $t > \tau_\beta$ , we have that

$$\begin{aligned} \mathbb{E}[h(\theta_t, z_t, O_t)] &\leq \mathbb{E}[h(\theta_{t-\tau_\beta}, z_{t-\tau_\beta}, O_t)] + C_h \left( \beta C_H + \alpha \frac{C_\delta C_G}{\lambda} \right) \tau_\beta + K_z L_h C_G \tau_\beta \alpha \\ &\leq 2K_z C_h m \rho^{\tau_\beta} + C_h \left( \beta C_H + \alpha \frac{C_\delta C_G}{\lambda} \right) \tau_\beta + K_z L_h C_G \tau_\beta \alpha \\ &\triangleq m_h \beta + m'_h \tau_\beta \beta, \end{aligned} \quad (104)$$

where  $m_h = 2K_z C_h$  and  $m'_h = C_h \left( C_H + \frac{C_\delta C_G}{\lambda} \right) + K_z L_h C_G$ . This completes the proof.  $\square$

Now we bound the tracking error in (79). We first rewrite it as

$$\begin{aligned} \mathbb{E}[\|z_{t+1}\|^2] &\leq q^{t+1} \|z_0\|^2 + 2 \underbrace{\sum_{j=0}^t q^{t-j} \beta \mathbb{E}[f(z_j, O_j)]}_{A_t} + 2 \underbrace{\sum_{j=0}^t q^{t-j} \beta \mathbb{E}[g(z_j, \theta_j, O_j)]}_{B_t} \\ &\quad + 2 \underbrace{\sum_{j=0}^t q^{t-j} \langle z_j, \omega(\theta_j) - \omega(\theta_{j+1}) \rangle}_{C_t} + \beta^2 C_1 \sum_{j=0}^t q^{t-j}. \end{aligned} \quad (105)$$

The second term  $A_t$  can be bounded as follows:

$$\begin{aligned} A_t &= 2 \sum_{j=0}^t q^{t-j} \beta \mathbb{E}[f(z_j, O_j)] \\ &= 2 \sum_{j=0}^{\tau_\beta-1} q^{t-j} \beta \mathbb{E}[f(z_j, O_j)] + 2 \sum_{j=\tau_\beta}^t q^{t-j} \beta \mathbb{E}[f(z_j, O_j)] \\ &\leq 8 \sum_{j=0}^{\tau_\beta-1} q^{t-j} K_z \beta + 2 \sum_{j=\tau_\beta}^t q^{t-j} \beta (m_f \beta + m'_f \tau_\beta \beta) \\ &\leq 16K_z \beta \frac{q^{t+1-\tau_\beta}}{1-q} + 2\beta (m_f \beta + m'_f \tau_\beta \beta) \frac{1-q^{t-\tau_\beta+1}}{1-q}. \end{aligned} \quad (106)$$

Similarly, we have that

$$B_t \leq 4K_z \beta \left( 1 + \frac{1}{\lambda} \right) C_\delta \frac{q^{t+1-\tau_\beta}}{1-q} + 2\beta (m_g \beta + m'_g \tau_\beta \beta) \frac{1-q^{t-\tau_\beta+1}}{1-q}. \quad (107)$$

For  $C_t$ , we first note that

$$\begin{aligned}
& \mathbb{E} [\langle z_i, \omega(\theta_i) - \omega(\theta_{i+1}) \rangle] \\
& \stackrel{(a)}{=} \mathbb{E} [\langle z_i, \nabla \omega(\theta_i)(\theta_i - \theta_{i+1}) + R_2 \rangle] \\
& = \mathbb{E} [\langle z_i, -\alpha \nabla \omega(\theta_i) G_i(\theta_i, \omega_i) + R_2 \rangle] \\
& = \mathbb{E} \left[ \left\langle z_i, -\alpha \nabla \omega(\theta_i) \left( G_i(\theta_i, \omega_i) - G_i(\theta_i, \omega(\theta_i)) + G_i(\theta_i, \omega(\theta_i)) + \frac{\nabla J(\theta_i)}{2} - \frac{\nabla J(\theta_i)}{2} \right) \right. \right. \\
& \quad \left. \left. + R_2 \right\rangle \right] \\
& = \mathbb{E} \left[ \underbrace{\left\langle z_i, -\alpha \nabla \omega(\theta_i) \left( G_i(\theta_i, \omega(\theta_i)) + \frac{\nabla J(\theta_i)}{2} \right) \right\rangle}_{(b)} \right] \\
& \quad + \mathbb{E} \left[ \underbrace{\left\langle z_i, -\alpha \nabla \omega(\theta_i) \left( G_i(\theta_i, \omega_i) - G_i(\theta_i, \omega(\theta_i)) - \frac{\nabla J(\theta_i)}{2} \right) + R_2 \right\rangle}_{(c)} \right], \tag{108}
\end{aligned}$$

where (a) follows from the Taylor expansion, and  $R_2$  is the remaining term with norm  $\|R_2\| = \mathcal{O}(\alpha^2)$ . Term (b) can be bounded using Lemma 9, where

$$\mathbb{E} \left[ \left\langle z_i, -\alpha \nabla \omega(\theta_i) \left( G_i(\theta_i, \omega(\theta_i)) + \frac{\nabla J(\theta_i)}{2} \right) \right\rangle \right] = \alpha \mathbb{E} [h(\theta_i, z_i, O_i)]. \tag{109}$$

Term (c) can be bounded as follows.

$$\begin{aligned}
& \left\langle z_i, -\alpha \nabla \omega(\theta_i) \left( G_i(\theta_i, \omega_i) - G_i(\theta_i, \omega(\theta_i)) - \frac{\nabla J(\theta_i)}{2} \right) + R_2 \right\rangle \\
& \stackrel{(d)}{\leq} \frac{\lambda\beta}{8} \|z_i\|^2 + \frac{2}{\lambda\beta} \left\| \alpha \nabla \omega(\theta_i) \left( G_i(\theta_i, \omega_i) - G_i(\theta_i, \omega(\theta_i)) - \frac{\nabla J(\theta_i)}{2} \right) + R_2 \right\|^2 \\
& \leq \frac{\lambda\beta}{8} \|z_i\|^2 \\
& \quad + \frac{6}{\lambda\beta} \left( \left\| \alpha \nabla \omega(\theta_i) (G_i(\theta_i, \omega_i) - G_i(\theta_i, \omega(\theta_i))) \right\|^2 + \left\| \alpha \nabla \omega(\theta_i) \frac{\nabla J(\theta_i)}{2} \right\|^2 + \|R_2\|^2 \right) \\
& \leq \frac{\lambda\beta}{8} \|z_i\|^2 + \frac{6\alpha^2 L_\delta^2}{\lambda\beta \lambda^2} (\gamma + 2\gamma R_\rho K)^2 \|z_i\|^2 + \frac{3\alpha^2 L_\delta^2}{2\lambda\beta \lambda^2} \|\nabla J(\theta_i)\|^2 + \frac{6}{\lambda\beta} \|R_2\|^2. \tag{110}
\end{aligned}$$

where (d) is from  $\langle x, y \rangle \leq \frac{\lambda\beta}{8} \|x\|^2 + \frac{2}{\lambda\beta} \|y\|^2$  for any  $x, y \in \mathbb{R}^N$  and the fact that  $\|G_i(\theta, \omega_1) - G_i(\theta, \omega_2)\| \leq (\gamma + 2\gamma R_\rho K) \|\omega_1 - \omega_2\|$  for any  $\|\theta\| \leq R$  and  $\omega_1, \omega_2$ , which is from (88).

Finally the term  $C_t$  can be bounded as follows.

$$\begin{aligned}
C_t & = 2 \sum_{j=0}^t q^{t-j} \langle z_j, \omega(\theta_j) - \omega(\theta_{j+1}) \rangle \\
& = 2 \sum_{j=0}^t q^{t-j} \alpha \mathbb{E} [h(\theta_j, z_j, O_j)] \\
& \quad + 2 \sum_{j=0}^t q^{t-j} \left( \frac{\lambda\beta}{8} \|z_j\|^2 + \frac{6\alpha^2 L_\delta^2}{\lambda\beta \lambda^2} (\gamma + 2\gamma R_\rho K)^2 \|z_j\|^2 + \frac{3\alpha^2 L_\delta^2}{2\lambda\beta \lambda^2} \|\nabla J(\theta_j)\|^2 + \frac{6}{\lambda\beta} \|R_2\|^2 \right) \\
& \triangleq 2 \sum_{j=0}^t q^{t-j} \alpha \mathbb{E} [h(\theta_j, z_j, O_j)] + M_t, \tag{111}
\end{aligned}$$

where  $M_t = 2 \sum_{j=0}^t q^{t-j} \left( \frac{\lambda\beta}{8} \|z_i\|^2 + \frac{6\alpha^2}{\lambda\beta} \frac{L_2^2}{\lambda^2} (\gamma + 2\gamma R_{\mathcal{L}} K)^2 \|z_i\|^2 + \frac{3\alpha^2}{2\lambda\beta} \frac{L_2^2}{\lambda^2} \|\nabla J(\theta_i)\|^2 + \frac{6}{\lambda\beta} \|R_2\|^2 \right)$ .  
From Lemma 9, we have that

$$\begin{aligned}
& 2 \sum_{j=0}^t q^{t-j} \alpha \mathbb{E}[h(\theta_j, z_j, O_j)] \\
& \leq 2\alpha \left( \sum_{j=0}^{\tau_\beta-1} q^{t-j} \mathbb{E}[h(\theta_j, z_j, O_j)] + \sum_{j=\tau_\beta}^t q^{t-j} \mathbb{E}[h(\theta_j, z_j, O_j)] \right) \\
& \leq 4K_z C_h \alpha \sum_{j=0}^{\tau_\beta-1} q^{t-j} + 2\alpha(m_h\beta + m'_h\tau_\beta\beta) \sum_{j=\tau_\beta}^t q^{t-j} \\
& = 4K_z C_h \alpha \frac{q^{t+1-\tau_\beta}}{1-q} + 2\alpha(m_h\beta + m'_h\tau_\beta\beta) \frac{1-q^{t-\tau_\beta+1}}{1-q}, \tag{112}
\end{aligned}$$

and this implies that

$$C_t \leq 4K_z C_h \alpha \frac{q^{t+1-\tau_\beta}}{1-q} + 2\alpha(m_h\beta + m'_h\tau_\beta\beta) \frac{1-q^{t-\tau_\beta+1}}{1-q} + M_t. \tag{113}$$

Now we plug the bounds on  $A_t$ ,  $B_t$  and  $C_t$  in (79), we have that

$$\begin{aligned}
& \mathbb{E}[\|z_{t+1}\|^2] \\
& \leq q^{t+1} \|z_0\|^2 + \beta^2 C_1 \frac{1-q^{t+1}}{1-q} + \left( 16K_z\beta + 4K_z C_\delta\beta \left(1 + \frac{1}{\lambda}\right) + 4K_z C_h \alpha \right) \frac{q^{t+1-\tau_\beta}}{1-q} \\
& \quad + \left( 2\beta(m_f\beta + m'_f\tau_\beta\beta) + 2\beta(m_g\beta + m'_g\tau_\beta\beta) + 2\alpha(m_h\beta + m'_h\tau_\beta\beta) \right) \frac{1-q^{t-\tau_\beta+1}}{1-q} + M_t \\
& \leq q^{t+1} \|z_0\|^2 + \beta^2 C_1 \frac{1-q^{t+1}}{1-q} + C_z \beta \frac{q^{t+1-\tau_\beta}}{1-q} + \beta(m_z\beta + m'_z\tau_\beta\beta) \frac{1-q^{t-\tau_\beta+1}}{1-q} + M_t, \tag{114}
\end{aligned}$$

where  $C_z = 16K_z + 4K_z C_\delta \left(1 + \frac{1}{\lambda}\right) + 4K_z C_h \frac{\alpha}{\beta}$ ,  $m_z = 2m_f + 2m_g + 2\frac{\alpha}{\beta}m_h$  and  $m'_z = 2m'_f + 2m'_g + \frac{2\alpha}{\beta}m'_h$ . Note that  $q = 1 + 3\beta^2 - 2\beta\lambda \triangleq 1 - u\beta \leq e^{-u\beta}$ , where  $u = 2\lambda - 3\beta$ . Hence it implies that

$$\begin{aligned}
& \frac{\sum_{t=0}^{T-1} \mathbb{E}[\|z_t\|^2]}{T} \\
& \leq \frac{1}{T} \left( \frac{\|z_0\|^2}{1-e^{-u\beta}} + \beta^2 C_1 \frac{T}{u\beta} + 4K_z^2 \tau_\beta \right. \\
& \quad \left. + \sum_{t=\tau_\beta-1}^{T-1} \left( C_z \beta \frac{q^{t+1-\tau_\beta}}{u\beta} + \beta(m_z\beta + m'_z\tau_\beta\beta) \frac{1-q^{t-\tau_\beta+1}}{u\beta} + M_t \right) \right) \\
& \leq \frac{1}{T} \left( \frac{\|z_0\|^2}{1-e^{-u\beta}} + \beta^2 C_1 \frac{T}{u\beta} + 4K_z^2 \tau_\beta \right. \\
& \quad \left. + c_z \beta \frac{\sum_{t=0}^{T-1} e^{-ut\beta}}{u\beta} + \beta(m_z\beta + m'_z\tau_\beta\beta) \frac{T}{u\beta} + \sum_{t=0}^{T-1} M_t \right) \\
& \leq \frac{1}{T} \left( \frac{\|z_0\|^2}{1-e^{-u\beta}} + \beta^2 C_1 \frac{T}{u\beta} + 4K_z^2 \tau_\beta + c_z \beta \frac{1}{(u\beta)(1-e^{-u\beta})} + \beta(m_z\beta + m'_z\tau_\beta\beta) \frac{T}{u\beta} \right. \\
& \quad \left. + \sum_{t=0}^{T-1} M_t \right) \\
& = \frac{1}{T} \left( \frac{\|z_0\|^2}{1-e^{-u\beta}} + \beta C_1 \frac{T}{u} + 4K_z^2 \tau_\beta + \frac{c_z}{u(1-e^{-u\beta})} + (m_z\beta + m'_z\tau_\beta\beta) \frac{T}{u} + \sum_{t=0}^{T-1} M_t \right)
\end{aligned}$$

$$\begin{aligned}
&\leq \frac{\|z_0\|^2}{T(1-e^{-u\beta})} + \beta \frac{C_1}{u} + 4K_z^2 \frac{\tau_\beta}{T} + \frac{c_z}{u(1-e^{-u\beta})T} + (m_z\beta + m'_z\tau_\beta\beta) \frac{1}{u} + \frac{\sum_{t=0}^{T-1} M_t}{T} \\
&\triangleq Q_T + \frac{\sum_{t=0}^{T-1} M_t}{T} \\
&= \mathcal{O} \left( \frac{1}{T\beta} + \beta\tau_\beta + \frac{\tau_\beta}{T} + \frac{\sum_{t=0}^{T-1} M_t}{T} \right), \tag{115}
\end{aligned}$$

where  $Q_T = \frac{\|z_0\|^2}{T(1-e^{-u\beta})} + \beta \frac{C_1}{u} + 4K_z^2 \frac{\tau_\beta}{T} + \frac{c_z}{u(1-e^{-u\beta})T} + (m_z\beta + m'_z\tau_\beta\beta) \frac{1}{u}$ .

We then compute  $\sum_{t=0}^{T-1} M_t$ . Recall that  $M_t = 2 \sum_{j=0}^t q^{t-j} \left( \frac{\lambda\beta}{8} \|z_i\|^2 + \frac{6\alpha^2 L_\delta^2}{\lambda\beta \lambda^2} (\gamma + 2\gamma R_\rho K)^2 \|z_i\|^2 + \frac{3\alpha^2 L_\delta^2}{2\lambda\beta \lambda^2} \|\nabla J(\theta_i)\|^2 + \frac{6}{\lambda\beta} \|R_2\|^2 \right)$ . From double sum trick, i.e.,  $\sum_{t=0}^{T-1} \sum_{i=0}^t e^{-u(t-i)\beta} x_i \leq \frac{1}{1-e^{-u\beta}} \sum_{t=0}^{T-1} x_t$  for any  $x_t \geq 0$ , we have that

$$\begin{aligned}
\sum_{t=0}^{T-1} M_t &\leq \frac{2}{1-e^{-u\beta}} \left( \frac{\lambda\beta}{8} + \frac{6\alpha^2 L_\delta^2}{\lambda\beta \lambda^2} (\gamma + 2\gamma R_\rho K)^2 \right) \sum_{t=0}^{T-1} \mathbb{E}[\|z_t\|^2] \\
&\quad + \frac{2}{1-e^{-u\beta}} \frac{3\alpha^2 L_\delta^2}{2\lambda\beta \lambda^2} \sum_{t=0}^{T-1} \mathbb{E}[\|\nabla J(\theta_t)\|^2] + \frac{6}{\lambda\beta} \frac{2}{1-e^{-u\beta}} \|R_2\|^2 T. \tag{116}
\end{aligned}$$

Note that  $1 - e^{-u\beta} = \mathcal{O}(\beta)$ , thus we can choose  $\alpha$  and  $\beta$  such that  $\frac{2}{1-e^{-u\beta}} \left( \frac{\lambda\beta}{8} + \frac{6\alpha^2 L_\delta^2}{\lambda\beta \lambda^2} (\gamma + 2\gamma R_\rho K)^2 \right) \leq \frac{1}{2}$ , then by plugging  $\sum_{t=0}^{T-1} M_t$  in (115) we have that

$$\frac{1}{2} \frac{\sum_{t=0}^{T-1} \mathbb{E}[\|z_t\|^2]}{T} \leq Q_T + \frac{2}{1-e^{-u\beta}} \frac{3\alpha^2 L_\delta^2}{2\lambda\beta \lambda^2} \frac{\sum_{t=0}^{T-1} \mathbb{E}[\|\nabla J(\theta_t)\|^2]}{T} + \frac{6}{\lambda\beta} \frac{2}{1-e^{-u\beta}} \|R_2\|^2, \tag{117}$$

and this implies that

$$\begin{aligned}
\frac{\sum_{t=0}^{T-1} \mathbb{E}[\|z_t\|^2]}{T} &\leq 2Q_T + \frac{2}{1-e^{-u\beta}} \frac{3\alpha^2 L_\delta^2}{\lambda\beta \lambda^2} \frac{\sum_{t=0}^{T-1} \mathbb{E}[\|\nabla J(\theta_t)\|^2]}{T} + \frac{6}{\lambda\beta} \frac{4}{1-e^{-u\beta}} \|R_2\|^2 \\
&= \mathcal{O} \left( \frac{1}{T\beta} + \beta\tau_\beta + \frac{\alpha^2 \sum_{t=0}^{T-1} \mathbb{E}[\|\nabla J(\theta_t)\|^2]}{\beta^2 T} \right), \tag{118}
\end{aligned}$$

which completes the development of error bound on the tracking error.

### D.3 Finite-Time Error Bound

Now with the tracking error in (118), we derive the finite-time error of the robust TDC. From Lemma 6 and Taylor expansion, we have that

$$\begin{aligned}
J(\theta_{t+1}) &\leq J(\theta_t) + \langle \nabla J(\theta_t), \theta_{t+1} - \theta_t \rangle + \frac{L_J}{2} \|\theta_{t+1} - \theta_t\|^2 \\
&= J(\theta_t) + \alpha \langle \nabla J(\theta_t), G_t(\theta_t, \omega_t) \rangle + \frac{L_J}{2} \alpha^2 \|G_t(\theta_t, \omega_t)\|^2 \\
&= J(\theta_t) - \alpha \left\langle \nabla J(\theta_t), -G_t(\theta_t, \omega_t) - \frac{\nabla J(\theta_t)}{2} + G_t(\theta_t, \omega(\theta_t)) - G_t(\theta_t, \omega(\theta_t)) \right\rangle \\
&\quad - \frac{\alpha}{2} \|\nabla J(\theta_t)\|^2 + \frac{L_J}{2} \alpha^2 \|G_t(\theta_t, \omega_t)\|^2 \\
&= J(\theta_t) - \alpha \langle \nabla J(\theta_t), -G_t(\theta_t, \omega_t) + G_t(\theta_t, \omega(\theta_t)) \rangle \\
&\quad + \alpha \left\langle \nabla J(\theta_t), \frac{\nabla J(\theta_t)}{2} + G_t(\theta_t, \omega(\theta_t)) \right\rangle - \frac{\alpha}{2} \|\nabla J(\theta_t)\|^2 + \frac{L_J}{2} \alpha^2 \|G_t(\theta_t, \omega_t)\|^2 \\
&\leq J(\theta_t) + \alpha \|\nabla J(\theta_t)\| (\gamma + 2\gamma R_\rho K) \|\omega(\theta_t) - \omega_t\| - \frac{\alpha}{2} \|\nabla J(\theta_t)\|^2
\end{aligned}$$

$$+ \alpha \left\langle \nabla J(\theta_t), \frac{\nabla J(\theta_t)}{2} + G_t(\theta_t, \omega(\theta_t)) \right\rangle + \frac{L_J}{2} \alpha^2 \|G_t(\theta_t, \omega_t)\|^2. \quad (119)$$

By taking expectation on both sides and summing up from 0 to  $T - 1$ , we have that

$$\begin{aligned} & \sum_{t=0}^{T-1} \frac{\alpha}{2} \mathbb{E}[\|\nabla J(\theta_t)\|^2] \\ & \leq J(\theta_0) - J(\theta_T) + \alpha(\gamma + 2\gamma RK\rho) \sqrt{\sum_{t=0}^{T-1} \mathbb{E}[\|\nabla J(\theta_t)\|^2]} \sqrt{\sum_{t=0}^{T-1} \mathbb{E}[\|z_t\|^2]} \\ & \quad + \sum_{t=0}^{T-1} \alpha \mathbb{E} \left[ \left\langle \nabla J(\theta_t), \frac{\nabla J(\theta_t)}{2} + G_t(\theta_t, \omega(\theta_t)) \right\rangle \right] + \frac{L_J}{2} \sum_{t=0}^{T-1} \alpha^2 \mathbb{E}[\|G_t(\theta_t, \omega_t)\|^2], \end{aligned} \quad (120)$$

which follows from the Cauchy-Schwartz inequality:  $\sum_{t=0}^{T-1} \mathbb{E}[\|\nabla J(\theta_t)\| \|z_t\|] \leq \sum_{t=0}^{T-1} \sqrt{\mathbb{E}[\|\nabla J(\theta_t)\|^2] \mathbb{E}[\|z_t\|^2]} \leq \sqrt{\sum_{t=0}^{T-1} \mathbb{E}[\|\nabla J(\theta_t)\|^2]} \sqrt{\sum_{t=0}^{T-1} \mathbb{E}[\|z_t\|^2]}$ . To bound the Markovian noise term, i.e.,  $\left\langle \nabla J(\theta), \frac{\nabla J(\theta)}{2} + G_t(\theta, \omega(\theta)) \right\rangle$ , we first need some bounds and smoothness conditions. It can be shown that

$$\|G_t(\theta, \omega(\theta))\| \leq C_\delta + \frac{C_\delta}{\lambda} (\gamma + 2\rho K \gamma R) \triangleq C_{G*}, \quad (121)$$

$$\|G_t(\theta, \omega(\theta)) - G_t(\theta', \omega(\theta'))\| \leq \left( L_\delta + \frac{L_\delta}{\lambda} (\gamma + 2\gamma R \rho K) + \frac{C_\delta}{\lambda} L'_\delta \right) \|\theta - \theta'\| \triangleq L_{G*} \|\theta - \theta'\|. \quad (122)$$

**Lemma 10.** Define  $\zeta(\theta, O_t) \triangleq \left\langle \nabla J(\theta), \frac{\nabla J(\theta)}{2} + G_t(\theta, \omega(\theta)) \right\rangle$ , and let  $\tau_\alpha \triangleq \min \{k : m\rho^k \leq \alpha\}$ . If  $t < \tau_\alpha$ , then

$$\mathbb{E}[\zeta(\theta_t, O_t)] \leq \frac{C_\delta L_\delta}{\lambda} \left( \frac{C_\delta L_\delta}{2\lambda} + C_{G*} \right) \triangleq C_\zeta; \quad (123)$$

and if  $t \geq \tau_\alpha$ , then

$$\mathbb{E}[\zeta(\theta_t, O_t)] \leq m_\zeta \alpha + m'_\zeta \tau_\alpha \alpha, \quad (124)$$

where  $m_\zeta = 2C_\zeta$  and  $m'_\zeta = C_G \left( \frac{L_J C_\delta L_\delta}{\lambda} + \frac{C_\delta L_\delta L_{G*}}{\lambda} + L_J C_{G*} \right)$ .

Next we plug the tracking error (118) in (120).

$$\begin{aligned} & \sum_{t=0}^{T-1} \frac{\alpha}{2} \mathbb{E}[\|\nabla J(\theta_t)\|^2] \\ & \leq J(\theta_0) - J(\theta_T) + \alpha(\gamma + 2\gamma RK\rho) \sqrt{\sum_{t=0}^{T-1} \mathbb{E}[\|\nabla J(\theta_t)\|^2]} \sqrt{2TQ_T + 2 \sum_{t=0}^{T-1} M_t} \\ & \quad + \alpha \tau_\alpha C_\zeta + \alpha^2 (T - \tau_\alpha) (m_\zeta + m'_\zeta \tau_\alpha) + \frac{L_J}{2} \alpha^2 C_G^2 T. \end{aligned} \quad (125)$$

Divided both sides by  $\frac{\alpha T}{2}$ , we have that

$$\begin{aligned} & \frac{\sum_{t=0}^{T-1} \mathbb{E}[\|\nabla J(\theta_t)\|^2]}{T} \\ & \leq \frac{2J(\theta_0) - 2J(\theta_T)}{\alpha T} + 2(\gamma + 2\gamma RK\rho) \sqrt{\frac{\sum_{t=0}^{T-1} \mathbb{E}[\|\nabla J(\theta_t)\|^2]}{T}} \sqrt{2Q_T + 2 \frac{\sum_{t=0}^{T-1} M_t}{T}} \\ & \quad + \frac{2\tau_\alpha C_\zeta}{T} + 2\alpha(m_\zeta + m'_\zeta \tau_\alpha) + L_J \alpha C_G^2. \end{aligned} \quad (126)$$



We know from (118) that  $2 \frac{\sum_{t=0}^{T-1} M_t}{T} \leq \frac{2}{1-e^{-u\beta}} \frac{3\alpha^2 L_\delta^2}{\lambda\beta \lambda^2} \frac{\sum_{t=0}^{T-1} \mathbb{E}[\|\nabla J(\theta_t)\|^2]}{T} + \frac{6}{\lambda\beta} \frac{4}{1-e^{-u\beta}} \|R_2\|^2$ , thus

$$\begin{aligned}
& \frac{\sum_{t=0}^{T-1} \mathbb{E}[\|\nabla J(\theta_t)\|^2]}{T} \\
& \leq \frac{2J(\theta_0) - 2J(\theta_T)}{\alpha T} + 2(\gamma + 2\gamma RK\varrho) \sqrt{\frac{\sum_{t=0}^{T-1} \mathbb{E}[\|\nabla J(\theta_t)\|^2]}{T}} \\
& \quad \left( \sqrt{2Q_T + \frac{6}{\lambda\beta} \frac{4}{1-e^{-u\beta}} \|R_2\|^2} + \sqrt{\frac{2}{1-e^{-u\beta}} \frac{3\alpha^2 L_\delta^2}{\lambda\beta \lambda^2} \frac{\sum_{t=0}^{T-1} \mathbb{E}[\|\nabla J(\theta_t)\|^2]}{T}} \right) \\
& \quad + \frac{2\tau_\alpha C_\zeta}{T} + 2\alpha(m_\zeta + m'_\zeta \tau_\alpha) + L_J \alpha C_G^2 \\
& = \frac{2J(\theta_0) - 2J(\theta_T)}{\alpha T} + 2(\gamma + 2\gamma RK\varrho) \sqrt{\frac{2}{1-e^{-u\beta}} \frac{3\alpha^2 L_\delta^2}{\lambda\beta \lambda^2} \frac{\sum_{t=0}^{T-1} \mathbb{E}[\|\nabla J(\theta_t)\|^2]}{T}} \\
& \quad \left( \sqrt{2Q_T + \frac{6}{\lambda\beta} \frac{4}{1-e^{-u\beta}} \|R_2\|^2} \right) 2(\gamma + 2\gamma RK\varrho) \sqrt{\frac{\sum_{t=0}^{T-1} \mathbb{E}[\|\nabla J(\theta_t)\|^2]}{T}} \\
& \quad + \frac{2\tau_\alpha C_\zeta}{T} + 2\alpha(m_\zeta + m'_\zeta \tau_\alpha) + L_J \alpha C_G^2 \\
& \triangleq \frac{2J(\theta_0) - 2J(\theta_T)}{\alpha T} + K_1 \frac{\sum_{t=0}^{T-1} \mathbb{E}[\|\nabla J(\theta_t)\|^2]}{T} + K_2 \sqrt{\frac{\sum_{t=0}^{T-1} \mathbb{E}[\|\nabla J(\theta_t)\|^2]}{T}} + \frac{2\tau_\alpha C_\zeta}{T} \\
& \quad + 2\alpha(m_\zeta + m'_\zeta \tau_\alpha) + L_J \alpha C_G^2, \tag{127}
\end{aligned}$$

where  $K_1 = 2(\gamma + 2\gamma RK\varrho) \sqrt{\frac{2}{1-e^{-u\beta}} \frac{3\alpha^2 L_\delta^2}{\lambda\beta \lambda^2}} = \mathcal{O}\left(\frac{\alpha}{\beta}\right)$  and  $K_2 = \left(\sqrt{2Q_T + \frac{6}{\lambda\beta} \frac{4}{1-e^{-u\beta}} \|R_2\|^2}\right) 2(\gamma + 2\gamma RK\varrho) = \mathcal{O}\left(\sqrt{\frac{\alpha^4}{\beta^2} + \frac{1}{T\beta} + \beta\tau_\beta}\right)$ . Thus we can choose  $\alpha$  and  $\beta$  such that  $K_1 \leq \frac{1}{2}$ , then we have that

$$\begin{aligned}
& \frac{\sum_{t=0}^{T-1} \mathbb{E}[\|\nabla J(\theta_t)\|^2]}{T} \\
& \leq \frac{4J(\theta_0) - 4J(\theta_T)}{\alpha T} + 2K_2 \sqrt{\frac{\sum_{t=0}^{T-1} \mathbb{E}[\|\nabla J(\theta_t)\|^2]}{T}} + \frac{4\tau_\alpha C_\zeta}{T} + 4\alpha(m_\zeta + m'_\zeta \tau_\alpha) + 2L_J \alpha C_G^2 \\
& \triangleq U + V \sqrt{\frac{\sum_{t=0}^{T-1} \mathbb{E}[\|\nabla J(\theta_t)\|^2]}{T}}, \tag{128}
\end{aligned}$$

where  $U = \frac{4J(\theta_0) - 4J(\theta_T)}{\alpha T} + \frac{4\tau_\alpha C_\zeta}{T} + 4\alpha(m_\zeta + m'_\zeta \tau_\alpha) + 2L_J \alpha C_G^2 = \mathcal{O}(\alpha\tau_\alpha + \frac{1}{\alpha T})$  and  $V = 2K_2$ . Hence, we have that

$$\begin{aligned}
& \frac{\sum_{t=0}^{T-1} \mathbb{E}[\|\nabla J(\theta_t)\|^2]}{T} \\
& \leq \left( \frac{V + \sqrt{V^2 + 4U}}{2} \right)^2 \\
& \stackrel{(a)}{\leq} V^2 + 2U \\
& \leq 16 \left( 2Q_T + \frac{6}{\lambda\beta} \frac{4}{1-e^{-u\beta}} \|R_2\|^2 \right) (\gamma + 2\gamma RK\varrho)^2 + \frac{8J(\theta_0) - 8J(\theta_T)}{\alpha T} + \frac{8\tau_\alpha C_\zeta}{T} \\
& \quad + 8\alpha(m_\zeta + m'_\zeta \tau_\alpha) + 4L_J \alpha C_G^2 \\
& = \mathcal{O}\left(\frac{1}{T\alpha} + \alpha\tau_\alpha + \frac{1}{T\beta} + \beta\tau_\beta\right), \tag{129}
\end{aligned}$$

where  $Q_T = \frac{\|z_0\|^2}{T(1-e^{-u\beta})} + \beta \frac{C_1}{u} + 4K^2 \frac{\tau_\beta}{T} + \frac{c_z}{u(1-e^{-u\beta})T} + (m_z \beta + m'_z \tau_\beta \beta) \frac{1}{u}$ .

## D.4 Constants

In this section we list all the constants occurred in our proof for the readers' reference.

$$C_\delta = c_{\max} + \gamma R \frac{\log |\mathcal{S}|}{\varrho} + (1 + \gamma)K, \quad (130)$$

$$L_\delta = (1 + \gamma), \quad (131)$$

$$L'_\delta = 2\gamma R\varrho, \quad (132)$$

$$L_J = 2 \left( \frac{L_\delta^2}{\lambda} + \frac{C_\delta L'_\delta}{\lambda} \right), \quad (133)$$

$$C_1 = 3 \left( C_\delta + \frac{C_\delta}{\lambda} \right)^2 + 3 \left( C_\delta + (1 + 2R\varrho K) \frac{C_\delta}{\lambda} \right)^2, \quad (134)$$

$$C_G = C_\delta + \gamma K + 2\gamma\varrho R K^2, \quad (135)$$

$$C_H = C_\delta + K, \quad (136)$$

$$K_z = K + \frac{C_\delta}{\lambda}, \quad (137)$$

$$m_g = 4K_z \left( 1 + \frac{1}{\lambda} \right) C_\delta, \quad (138)$$

$$m'_g = 4K_z L_\delta C_G \left( 1 + \frac{1}{\lambda} \right) + C_\delta \left( 1 + \frac{1}{\lambda} \right) \left( C_H + \frac{C_G C_\delta}{\lambda} \right), \quad (139)$$

$$m_f = 8K_z^2, \quad (140)$$

$$m'_f = 8K_z \left( C_H + \frac{C_G C_\delta}{\lambda} \right), \quad (141)$$

$$m_h = 2K_z C_h, \quad (142)$$

$$m'_h = C_h \left( C_H + \frac{C_\delta C_G}{\lambda} \right) + K_z L_h C_G, \quad (143)$$

$$C_{G^*} = C_\delta + \frac{C_\delta}{\lambda} (\gamma + 2\varrho K \gamma R), \quad (144)$$

$$L_{G^*} = L_\delta + \frac{L_\delta}{\lambda} (\gamma + 2\gamma R \varrho K) + \frac{C_\delta}{\lambda} L'_\delta, \quad (145)$$

$$L_h = \frac{L'_\delta}{L_\delta} C_h + \frac{L_\delta L_{G^*}}{\lambda} + \frac{L_\delta L_J}{2\lambda}, \quad (146)$$

$$C_h = \frac{L_\delta}{\lambda} \left( C_\delta + \gamma(1 - R) + 2\varrho K \gamma R \frac{C_\delta}{\lambda} + \frac{2L_\delta C_\delta}{\lambda} \right), \quad (147)$$

$$C_\zeta = \frac{C_\delta L_\delta}{\lambda} \left( \frac{C_\delta L_\delta}{2\lambda} + C_{G^*} \right), \quad (148)$$

$$m_\zeta = 2C_\zeta, \quad (149)$$

$$m'_\zeta = C_G \left( \frac{L_J C_\delta L_\delta}{\lambda} + \frac{C_\delta L_\delta L_{G^*}}{\lambda} + L_J C_{G^*} \right) \quad (150)$$

## E Experiments

### Experiments in Section 6.1:

Frozen Lake Problem. We consider a  $4 \times 4$  Frozen Lake problem. We set  $\gamma = 0.96$ ,  $\alpha = 0.8$ .

Cart-Pole Problem. We set  $\gamma = 0.95$ ,  $\alpha = 0.2$ .

### Experiments in Section 6.2:

Frozen Lake Problem. We consider a  $4 \times 4$  Frozen Lake problem. We set  $\alpha = 0.1$ ,  $\beta = 0.5$  and  $\gamma = 0.9$ . The initialization is  $\theta = (1, 1, 1, 1, 1) \in \mathbb{R}^5$  and  $\omega = (0, 0, 0, 0, 0)$ . Each entry of every base function  $\phi_s$  is generated uniformly at random between  $(0, 1)$ .

**Additional Experiments on the Taxi Problem.**

We use the same setting as in Section 6.1 to demonstrate the robustness of our robust Q-learning algorithm. For the step size and discount factor, we set  $\alpha = 0.3$  and  $\gamma = 0.8$ . The results are shown in fig. 5, from which the same observation that our robust Q-learning is robust to model uncertainty, and achieves a much higher reward when the mismatch between the training and test MDPs enlarges.

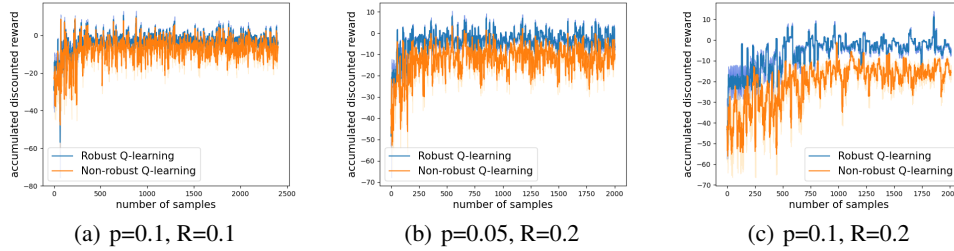

Figure 5: **Taxi-v3**: robust Q-learning v.s. non-robust Q-learning.
